# Supplementary material for: Fundamentals and Applications of Focused Ultrasound-Assisted Cancer Immune Checkpoint Inhibition for Solid Tumors
Source: MDPI journal article supplement (doi:10.3390/pharmaceutics16030411), 2024-03-16
Supplement: s1 [file s1]

# Supplementary Materials: Fundamentals and Applications of Focused Ultrasound-Assisted Cancer Immune Checkpoint Inhibition for Solid Tumors

Sepideh Jahangiri and François Yu

Table S1. Summary of bioeffects following targeted FUS with/without MB treatment

|                           | FUS modality   | MB  | I <sub>SPTA</sub> (W/cm2) | F (MHz) | P (MPa)   | PRF (kHz)      | DC (%) | MI        | ICI             | Effect                                                                                                                                                                                                                                                                                                                                      | Tumor type        | Immune Phenotype |
|---------------------------|----------------|-----|---------------------------|---------|-----------|----------------|--------|-----------|-----------------|---------------------------------------------------------------------------------------------------------------------------------------------------------------------------------------------------------------------------------------------------------------------------------------------------------------------------------------------|-------------------|------------------|
| Abe, 2022 [176]           | M-HIFU, T-HIFU | No  | 104, 988                  | 1.5     | 12.5, 7.7 | 0.005, 0.001   | 2, 50  | 10.2, 6.3 | aPD-L1          | Greater systemic antitumor immune responses in M-HIFU (compared with T-HIFU), M1 macrophage polarization, M-HIFU+aPDL1 treatment increased CTLs and augmented abscopal effect. Major roles attributed to CTLs and NK cells in antitumor immunity. Tumor debulking in both modalities, extended survival and abscopal effect only in M-HIFU. | E0771, MM3MG-HER2 | Immune excluded  |
| Bandyopadhyay, 2016 [118] | M-HIFU, pFUS   | No  | 734, 215                  | 1       | 5.4, 2.9  |                | 75     | 5.4, 2.9  | No              | Tumor debulking, increased tumoral CD45+ but not CTLs, reversion of T cell anergy and tolerance, reduced pulmonary metastases and prolonged survival. HIFU is more effective if combined with LoFU prior to ablation.                                                                                                                       | B16F1, B16F10     | Inflamed         |
| Chin, 2009 [151]          | M-HIFU         | Yes |                           | 1.2     | 5         | 0.001, 0.00005 |        | 4.5       | No              | Transient vascular shutdown (up to 10 minutes), inflammatory response, tumor debulking,                                                                                                                                                                                                                                                     | MC38              | Immune excluded  |
| Eranki, 2020 [96]         | M-HIFU         | No  |                           | 1.5     | 14        | 0.001          |        | 11.4      | aCTLA-4, aPD-L1 | Vascular shutdown, 62% improvement in survival in combined group, improved abscopal effect, increased TILs, systemic inflammation induction, overcome treatment resistance, tumor debulking.                                                                                                                                                | Neuro2a           | Immune excluded  |

|                        |                |    |         |     |           |        |          |           |                       |                                                                                                                                                                                                                                                                                                                                                                           |                                         |                                     |
|------------------------|----------------|----|---------|-----|-----------|--------|----------|-----------|-----------------------|---------------------------------------------------------------------------------------------------------------------------------------------------------------------------------------------------------------------------------------------------------------------------------------------------------------------------------------------------------------------------|-----------------------------------------|-------------------------------------|
| Iwanicki, 2023 [95]    | M-HIFU         | No |         | 1   | 35        | 0.05   |          | 35        | No                    | Increased apoptosis and TNF- $\alpha$ , reduced pericyte coverage and PDGF- $\beta$ , reduced hypoxia and VEGF. Vasodilation around ablated tissue.                                                                                                                                                                                                                       | NGP-Luc                                 | Immune excluded                     |
| Mouratidis, 2021 [179] | M-HIFU         | No | 96      | 1.5 | 17        | 0.0001 | 1        | 13.9      | aPD-1, aCTLA-4        | Extended survival and tumor debulking, increased CTL                                                                                                                                                                                                                                                                                                                      | KPC                                     | Immune excluded                     |
| Pepple, 2023 [98]      | M-HIFU         | No |         |     | 30        | 0.1    |          |           | CTLA-4                | Inhibited tumor growth with abscopal effect, HMGB1 expression, expression of immunogenic cell death mediators and innate immune activation following increased NK cell infiltration, delayed tumoral CTL infiltration accompanied with activation of ferroptosis pathway in cancer cells. Maximal activation of ferroptosis when M-HIFU is combined with CTLA-4 blockade. | B16F10, Hepa1-6                         | Inflamed Immune excluded            |
| Qu, 2020 [92]          | M-HIFU         | No |         | 1   | 30        | 0.1    |          | 30        | aCTLA-4               | Tumoral and systemic TAA-lymphocyte responses, DAMP release (IFN- $\gamma$ , HMGB1 and positioning of Calreticulin in membrane), histotripsy increased CTL infiltration greater than thermal ablative and 15Gy radiotherapy, abscopal effect, improved efficacy of aCTLA4 by histotripsy, tumor debulking                                                                 | B16GP33, Hepa1-6                        | Inflamed and immune excluded, resp. |
| Schade, 2019 [97]      | M-HIFU         | No |         | 1.5 | 17-20     | 0.001  |          | 13.8-16.3 | No                    | TILs increase 2 days post treatment, vascular shutdown, systemic and intrarenal acute inflammatory responses (TNF- $\alpha$ , IFN- $\gamma$ , HMGB1, IL-10 and IL-6 elevation)                                                                                                                                                                                            | Eker, rat model of renal carcinoma cell | Immune excluded                     |
| Fite, 2021 [84]        | M-HIFU, T-HIFU | No | 48, 320 | 3   | 16.9, 3.1 |        | 0.5, 100 | 9.7, 1.8  | aPD-1 +/- CpG priming | Both modalities upregulate innate immune receptors (i.e. Nod1, Nlrp3, Aim2, TLR, and Cstb). Activation of wound healing inflammatory response. Upregulation of IL-1b and IL-6. CTL infiltration only increased in T-HIFU group when combined with aPD-1.                                                                                                                  | NDL                                     | Immune excluded                     |

|                                 |        |     |     |     |     |     |  |     |                       |                                                                                                                                                                                                                                                                                                                         |                        |                                                      |
|---------------------------------|--------|-----|-----|-----|-----|-----|--|-----|-----------------------|-------------------------------------------------------------------------------------------------------------------------------------------------------------------------------------------------------------------------------------------------------------------------------------------------------------------------|------------------------|------------------------------------------------------|
| <b>Chavez, 2018 [175]</b>       | T-HIFU | No  |     | 3   | 3.1 |     |  | 1.8 | aPD-1                 | 100% tumor rejection when TLR9 agonist (CpG) and ablative FUS are combined (in NDL group). Increased T cell activation and infiltration increased IFN- $\gamma$ , Macrophage and DC polarization toward CD169+ subset.                                                                                                  | B16F10, NDL, MMTV-PyMT | Inflamed, immune excluded and immune excluded, resp. |
| <b>Deng, 2010 [83]</b>          | T-HIFU | No  |     | 9.5 |     |     |  |     | No                    | Trained DCs with HIFU-treated tumor, tumor lysate and mouse serum were studied. Reduced tumor growth in HIFU-ablated tumor DCs; increased DC response and IFN- and IL-12 in HIFU-treated tumor and tumor lysate groups. No difference in survival rate.                                                                 | H22                    | Inflamed                                             |
| <b>Sheybani, 2020 [112]</b>     | T-HIFU | No  |     | 3   |     |     |  | 100 | Gemcitabine +/- aPD-1 | T-HIFU+ gemcitabine reduced tumor growth and increased survival. Better response while aPD-1 was administered earlier. Extended survival and tumor debulking.                                                                                                                                                           | 4T1, E0771             | Immune excluded                                      |
| <b>Silvestrini, 2017 [85]</b>   | T-HIFU | No  |     | 3   | 3.1 |     |  | 1.8 | aPD-1                 | Vascular shutdown, primed immunotherapy strengthened FUS treatment, reduced immunosuppressive mediators while increased immunostimulatory cells, acute tumor debulking, HMGB1 increased, enhanced vascularization within the TDLNs (tumor draining lymph nodes), increased lymphatic drainage, complete response in 80% | NDL                    | Immune excluded                                      |
| <b>Kheiroloomoom, 2019 [75]</b> | HT     | No  |     | 1.5 | 2.5 | 0.1 |  | 2   | aPD-1 + CpG           | Copper-doxorubicin thermosensitive liposomes improved efficacy of immune-thermal combined treatment, 90% of mice rejected the tumor, increased TILs                                                                                                                                                                     | B16F10, NDL, MMTV-PyMT | Inflamed, immune excluded and immune excluded, resp. |
| <b>Suzuki, 2010 [101]</b>       | HT     | Yes | 0.7 | 1   | 0.7 |     |  | 0.7 | No                    | IL-12 delivery, T cell infiltration, tumor debulking, vascular permeability                                                                                                                                                                                                                                             | OV-HM                  | Immune desert                                        |

|                            |       |     |                     |      |               |                  |      |               |       |                                                                                                                                                    |                                    |                                     |
|----------------------------|-------|-----|---------------------|------|---------------|------------------|------|---------------|-------|----------------------------------------------------------------------------------------------------------------------------------------------------|------------------------------------|-------------------------------------|
| <b>Aydin, 2019 [76]</b>    | pFUS, | No  | 3, 13, 53, 120, 213 | 1    | 1, 2, 4, 6, 8 | 10               | 10   | 1, 2, 4, 6, 8 | No    | Induced DNA strand breaks at PNP>6Mpa, anti-inflammatory responses suppressed at >4MPa, increased DAMPS and vascular inflammation at 6MP           | 4T1 and B16                        | Immune excluded and Inflamed, resp. |
| <b>Cohen, 2021 [77]</b>    | pFUS, | No  | 120                 | 1.15 | 6             | 0.005            | 10   | 5.6           | No    | Demonstrate tumor-type importance in defining FUS mediated antitumor immune responses, increased DAMPS, elevated CC3 up to 3 days, tumor debulking | 4T1 and B16                        | Immune excluded and Inflamed, resp. |
| <b>Hayashi, 2022 [117]</b> | pFUS  | No  | 3.0                 | 3    |               | 0.001, 0.01, 0.1 | 20   |               | aPD-1 | Tumor debulking, increased CC3 and CD3-positive cells                                                                                              | TRAMP-C2                           | Immune desert                       |
| <b>Lee, 2017 [116]</b>     | pFUS  |     | 42, 167             | 1.5  | 5, 10         | 0.001            | 5    | 4, 8.1        | No    | Tumoral ECM re-arrangement due to mechanical effects, increased deep penetration of chitosan nanoparticles                                         | A549 (ECM-rich) and SCC7 (ECM-low) | Inflamed and immune desert, resp.   |
| <b>Amate, 2019 [130]</b>   | UTMC  | Yes | 12                  | 1    | 0.85          | 0.2              | 50   | 0.85          | aCD73 | Increased mAb extravasation, effects of pulse length on drug delivery, vascular permeability                                                       | 4T1                                | Immune excluded                     |
| <b>Belcik, 2017 [125]</b>  | UTMC  | Yes |                     | 1.3  | 1.5           | 9.3              |      | 1.3           | No    | Increased perfusion, reversed ischemia, increased eATP                                                                                             | -                                  | -                                   |
| <b>Bulner, 2019 [167]</b>  | UTMC  | Yes |                     | 1    | 1.65          | 1, 0.05          |      | 1.65          | aPD-1 | Vascular shutdown, enhanced efficacy of immunotherapy and tumor debulking                                                                          | CT26                               | Immune excluded                     |
| <b>Burke, 2011 [152]</b>   | UTMC  | Yes | 0.004               | 1    | 1.1           | 0.0002           | 0.01 | 1, 1.2        | No    | Vascular shutdown, tumor debulking, and apoptosis                                                                                                  | C6                                 | Immune desert                       |

|                       |      |     |            |     |            |         |       |            |        |                                                                                                                                                                                                                                                                                                            |            |                 |
|-----------------------|------|-----|------------|-----|------------|---------|-------|------------|--------|------------------------------------------------------------------------------------------------------------------------------------------------------------------------------------------------------------------------------------------------------------------------------------------------------------|------------|-----------------|
| Curley, 2020 [163]    | UTMC | Yes | 0.04       | 1   | 0.5        |         | 0.5   | 0.5        | No     | Enhanced perfusion, BBB/BBB opening, vascular inflammation and cytokine release, increased infiltrated matured dendritic cells (CD86 <sup>+</sup> ), increased TNF- $\alpha$ , IL-6, CXCLs, I-CAM1 and PSMB88 (immunoproteasome subunit functioning in antigen presentation) at 6 and 24h post sonication. | B16F1-OVA  | Inflamed        |
| Curley, 2020 [145]    | UTMC | Yes | 0.03, 0.05 | 1.1 | 0.45, 0.55 |         | 0.5   | 0.43, 0.52 | No     | BBB and BTB opening augments the velocity and direction (~70-80°) of interstitial flow, increased tumoral dispersion of nanoparticles by >100%.                                                                                                                                                            | U87        | Immune desert   |
| Daecher, 2017 [153]   | UTMC | Yes |            | 4.2 | 2.5        | 0.04    |       | 1.2        | No     | Vascular shutdown, tumor debulking when combined with radiotherapy (5Gy)                                                                                                                                                                                                                                   | Hu 7.5     | Immune excluded |
| El Kaffas, 2018 [155] | UTMC | Yes | 1.1        | 0.5 | 0.6        | 3       | 10    | 0.8        | No     | Vascular shutdown up to 72 h, cell death increased, improved radiotherapy                                                                                                                                                                                                                                  | MCA-129    | Immune desert   |
| Eisenbrey, 2018 [149] | UTMC | Yes |            | 4.2 | 2.5        | 0.004   |       | 1.4        | No     | Reduced hypoxia, O <sub>2</sub> delivery, increased tumoral O <sub>2</sub> , increased radio-sensitization, tumor debulking                                                                                                                                                                                | MDA-MB-231 | Immune excluded |
| Goertz, 2009 [150]    | UTMC | Yes | 0.004      | 1   | 0.74       | 1, 0.05 | 0.024 | 0.7        | No     | Antivascular effects induced tumor growth delay                                                                                                                                                                                                                                                            | MeWo       | Inflamed        |
| Goertz, 2020 [177]    | UTMC | Yes | 0.06       | 0.6 | 3          |         | 0.02  | 3.9        | aPD-L1 | Vascular shutdown, complete tumor debulk in 7 out of 8 mice, increased survival                                                                                                                                                                                                                            | EMT6       | Immune excluded |
| Hunt, 2015 [156]      | UTMC | Yes | 0.02       | 3   | 0.22       |         | 1     | 0.13       | No     | Vascular shutdown, increased hypoxia, increased CD45 <sup>+</sup> /CD3 <sup>+</sup> cells                                                                                                                                                                                                                  | K1735      | Inflamed        |
| Jahangiri, 2023 [158] | UTMC | Yes | 12         | 1   | 0.85       | 0.2     | 50    | 0.85       | No     | Perfusion maintenance, induced vascular inflammation, increased apoptosis and decreased cancer cell proliferation                                                                                                                                                                                          | MC38       | Immune excluded |

|                            |      |     |             |        |                |       |     |          |             |                                                                                                                                                                                                                                                                                                                           |                        |                 |
|----------------------------|------|-----|-------------|--------|----------------|-------|-----|----------|-------------|---------------------------------------------------------------------------------------------------------------------------------------------------------------------------------------------------------------------------------------------------------------------------------------------------------------------------|------------------------|-----------------|
| <b>Joiner, 2022 [160]</b>  | UTMC | Yes | 0.8         | 1      | 0.5            | 0.1   | 10  | 0.5      | No          | Single UTMC monotherapy reduced tumor growth by 2 weeks post treatment; no effect on TILs but increased APCs in TDLNs, no increase in HMGB1, CC3, and HSP70 indicating necessitate of repeating times of treatment or combining it with immunotherapy                                                                     | KPC                    | Immune excluded |
| <b>Kovacs, 2017 [142]</b>  | UTMC | Yes | 0.03        | 0.6    | 0.3            |       | 1   | 0.4      | No          | BBB opening, increased DAMP, sterile inflammation, NF B signaling lasted for 24h, increased ICAM. Vascular inflammation.                                                                                                                                                                                                  | -                      |                 |
| <b>Li, 2021 [90]</b>       | UTMC | Yes | 0.04, 0.4   | 4      | 0.8, 2.4       | 0.001 | 0.2 | 0.4, 1.2 | aPD-L1      | Increased tumor perfusion, tumor vascular normalization, tumor debulking, immune cell infiltration                                                                                                                                                                                                                        | MC38                   | Immune excluded |
| <b>Liu, 2012 [162]</b>     | UTMC | Yes |             | 0.5    | 0.6, 1.4       | 0.001 |     | 0.85     | No          | Vascular permeability, tumor debulking, continuous non-T <sub>reg</sub> cell infiltration, increased mast cells at day 1 post treatment but decreased afterwards.                                                                                                                                                         | CT26                   | Immune excluded |
| <b>McMahon, 2017 [143]</b> | UTMC | Yes |             | 0.6    | 0.3            |       |     |          | No          | High MB dose (10X) but not the clinical dose, induces NFκB signaling, sterile inflammation                                                                                                                                                                                                                                | -                      |                 |
| <b>Meng, 2021 [146]</b>    | UTMC | Yes | 0.001, 0.06 | 0.2    | 0.5            |       | 0.7 | 1        | Trastuzumab | BBB opening, increased drug delivery, tumor debulking, no severe adverse side effect in human patients. Vascular permeability                                                                                                                                                                                             | HER2+ brain metastases | Immune excluded |
| <b>Michon, 2022 [79]</b>   | UTMC | Yes |             | 1, 1.3 | 0.25-0.75, 1.5 |       |     |          | No          | Reduced hypoxia, increased perfusion, reduced HIF1 expression, increased radiosensitization at 8 Gy                                                                                                                                                                                                                       | PC3                    | Immune desert   |
| <b>Sabbagh, 2021 [144]</b> | UTMC | Yes | 0.075       | 1      | 0.3            | 0.001 | 2.5 | 0.3      | aPD-1       | Increased median survival of UTMC+aPD1 group to 58 days vs. 39 days in control group. Increased delivery of CAR T-cell to the CNS after 24h and 72h post treatment. Increased median survival in combined vs. monotherapy of CAR T cell by 129%. Local increase in CXCL-10 secreting APCs and infiltrated CTLs in the TME | GL261                  | Immune desert   |

|                      |              |     |                |       |             |      |         |             |        |                                                                                                                                                                                                                                                                                                                                                                     |       |                 |
|----------------------|--------------|-----|----------------|-------|-------------|------|---------|-------------|--------|---------------------------------------------------------------------------------------------------------------------------------------------------------------------------------------------------------------------------------------------------------------------------------------------------------------------------------------------------------------------|-------|-----------------|
| Sheybani, 2021 [180] | UTMC         | Yes | 0.03           | 1.1   | 0.4         |      | 0.5     | 0.4         | aCD47  | BBB opening enhances aCD47 delivery. Superlative delivery of aCD47 if it is injected after UTMC treatment. Repeated session of UTMC increased aCD47 delivery, tumor debulking and extended survival.                                                                                                                                                                | GL261 | Immune desert   |
| Tan, 2021 [182]      | UTMC         | Yes | 0.1 - 0.115    | 5     | 2.19 - 2.30 | 0.5  | 0,065   | 0.98 - 1.03 | aPD-L1 | In the UTMC group, splenic CEC reduction and CTL enhancement; In the combined group, tumor growth inhibition, increased IFN- $\gamma$ + CTL and CD4 <sup>+</sup> T cells, and reduction of TGF- $\beta$ <sup>+</sup> CD11b <sup>+</sup> cells.                                                                                                                      | LLC   | Inflamed        |
| Tang, 2023 [181]     | UTMC, T-HIFU | Yes |                | 0.025 |             | 0.15 | 50, 100 |             | aPD-L1 | Enhanced therapeutic effect with UTMC in reducing tumor growth and improving survival rate. Tumor perfusion reduced 48h post UTMC, inflammatory responses in tumor and TDLNs increased two days post UTMC, increased calreticulin, HSP70, and HMGB1Increased TILs (CTL, CD4 <sup>+</sup> Th17 <sup>+</sup> , and TAM), decreased Treg and MDSCs two days post-UTMC. | MC38  | Immune excluded |
| Wu, 2023 [178]       | UTMC         | Yes | 3              | 1     | 0,4         |      | 50      |             | aPD-L1 | Blood vessel rupture caused perfusion shut down, tumor growth inhibition, induced ICD due to increased calreticulin, increased DC and CTL in tumor and TDLNs, enhanced IL-12 and TNF- $\alpha$ expression, improved aPD-L1 efficiency following combined treatment.                                                                                                 | 4T1   | Immune excluded |
| Xiao, 2019 [147]     | UTMC         | Yes | 0.1            | 1     | 1           | 0.01 | 0.2     | 1           | No     | Vascular permeability, reduced IFP and improved drug penetration in tumors                                                                                                                                                                                                                                                                                          | VX2   | Immune excluded |
| Zhang, 2019 [148]    | UTMC         | Yes | 0.07, 0.6, 1.7 | 1     | 1, 3, 5     | 0.01 | 0.2     | 1, 3, 5     | No     | Reduced IFP at 3 and 5 MPa but no changes in the morphology of collagen and reticular fibers in rabbit tumors 24h post treatment                                                                                                                                                                                                                                    | VX2   | Immune excluded |

DC%: Duty Cycle; F: Frequency; HT: Hyperthermia; ICI: Immune Checkpoint Inhibitor;  $I_{SPTA}$ : Spatial peak temporal average intensity; M-HIFU: Mechanical HIFU; MI: Mechanical Index; P: pressure; pFUS: pulsed FUS; PRF: Pulse Repetition Frequency; T-HIFU: Thermal HIFU; UTMC: Ultrasound Targeted Microbubble Cavitation.
